# Supplementary material for: Coordination of multiple enzyme activities by a single PCNA in archaeal Okazaki fragment maturation
Source: PubMed Central journal article supplement — EMBO J. 2012 Feb 3;31(6):1556–67. doi: 10.1038/emboj.2012.12 (PMC3321178; doi:10.1038/emboj.2012.12), 2012-02-03
Supplement: emboj201212s1.pdf [file emboj201212s1.pdf]

## Supplementary Information for

### Coordination of multiple enzyme activities by a single PCNA in archaeal Okazaki fragment maturation

Thomas R. Beattie and Stephen D. Bell\*

Sir William Dunn School of Pathology, Oxford University, South Parks Road, Oxford OX1 3RE, U.K.

#### Contents

Table S1. Oligonucleotides used to generate *in vitro* substrates

Figures S1-S4.

Supplementary Materials and Methods

Supplementary References

**Table S1. Oligonucleotides used to generate *in vitro* substrates**

Substrates were assembled from oligonucleotides as described in Materials and Methods.

Ribonucleotides are underlined. All sequences are 5' to 3'.

| Oligonucleotide   | Sequence                                                                                                  |
|-------------------|-----------------------------------------------------------------------------------------------------------|
| Template          | GTATAATGTTTATCTTATTTATCTCAATTAGCTAGATTAAGTAATTTCCAGAGG<br>AAATAGATGGGTCCCACCTTCGCTTTTAAATGGTATTTTGTGGACTT |
| Upstream          | AAGTCCACAAAATACCATTTAAAAGCGAAG                                                                            |
| Downstream_RNA    | <u>AUUUCCUCUGGAA</u> ATTACTTAATCTAGCTAATTGAGATAAATAAGATAAACATT<br>ATAC                                    |
| Downstream_DNA    | ATTTCCCTCTGGAAATTACTTAATCTAGCTAATTGAGATAAATAAGATAAACATT<br>ATAC                                           |
| Upstream_1nt      | AAGTCCACAAAATACCATTTAAAAGCGAAGTGGGACCCATCTATTTCCCTCTGGA<br>AATTAC                                         |
| Downstream_flap   | TAAAGGAGACCTTTAATCTTAATCTAGCTAATTGAGATAAATAAGATAAACATT<br>ATAC                                            |
| Nick_1            | GATCGTGGCTATTGTCGCCCTTATTCCGAT                                                                            |
| Nick_2            | AGTGACTACATTTTTGTAGTCACTATCGGAATAAGGGCGACAATAGCCACGATC                                                    |
| Template_Idling   | GTTGTTGGGTTGGTTTTGTTTGGTGGAACCTTTTTTTTTTTTTTTTTTTTTTTTTTTT<br>TCTCCCTTCTTCTCCTCCCTCTCCCTTCCCT             |
| Upstream_Idling   | AGGGAAGGGAGAGGGAGGAGAAGAAGGGAG                                                                            |
| Downstream_Idling | <u>GGUUC</u> CACCAAACAAAACCAACCAACAAC                                                                     |

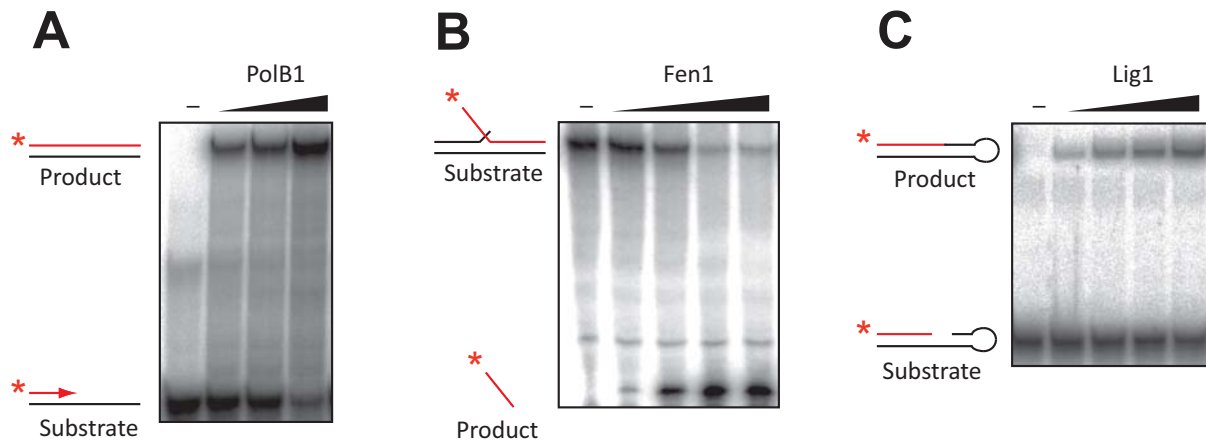

**Figure S1. Catalytic activities of PolB1, Fen1 and Lig1 *in vitro***

(A) PolB1 *in vitro* activity on a model primer-template substrate. Substrate and product are indicated on the left with radiolabelled strand indicated in red and label position with a red asterisk. Substrate was incubated with 0, 2.5, 5, 10 fmol PolB1 and reaction products were separated by denaturing PAGE. Assays were performed as described in Materials and Methods with the exception that KCl and MnCl<sub>2</sub> were omitted. (B) Fen1 *in vitro* activity on an optimal double flap substrate. Substrate and product are indicated on the left with the radiolabelled strand indicated in red and label position with a red asterisk. Substrate was incubated with 0, 16, 258, 4125, 66000 fmol Fen1 and reaction products were separated by denaturing PAGE. (C) Lig1 *in vitro* activity on a model nicked substrate. Substrate and product are indicated on the left with radiolabelled strand indicated in red and label position with a red asterisk. Substrate was incubated with 0, 3.4, 6.7, 13.5, 27 pmol Lig1 and reaction products were separated by denaturing PAGE.

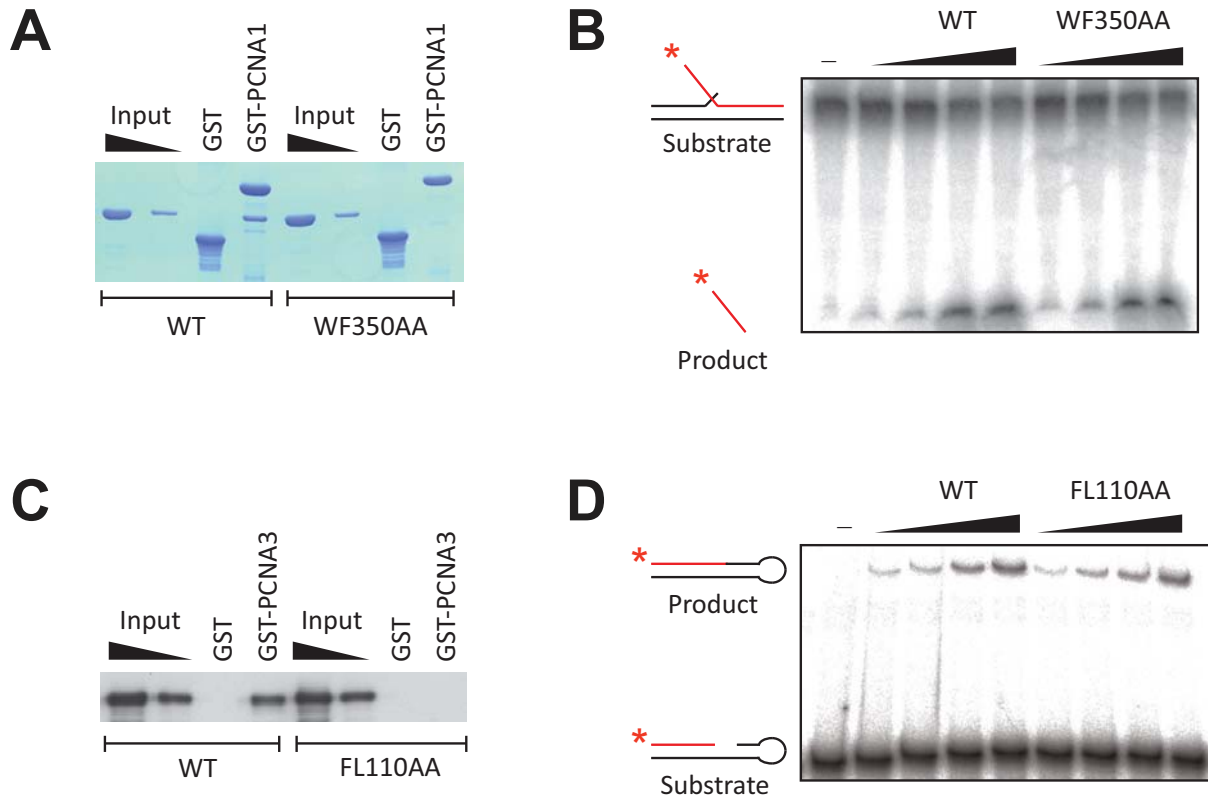

**Figure S2. Characterisation of Fen1 and Lig1 PIP mutants**

(A) Comparison of PCNA1 binding activity of WT or PIP mutant (WF350AA) Fen1 by GST-pull down. Reactions were analysed by SDS-PAGE and visualised with Coomassie staining. 50% and 10% Fen1 inputs are shown. (B) Comparison of the *in vitro* activity of WT or PIP mutant Fen1 (WF350AA) on an optimal double flap substrate. Substrate and product are indicated on the left with radiolabelled strands indicated in red and label position by a red asterisk. Substrate was incubated with 0, 55, 219, 875, 3500 fmol Fen1 proteins and reaction products were separated by denaturing PAGE. (C) Comparison of PCNA3 binding activity of WT or PIP mutant (FL110AA) Lig1 by GST-pull down. Reactions were analysed by western blotting. 50% and 10% Lig1 inputs are shown. (D) Comparison of the *in vitro* activity of WT or PIP mutant Lig1 (FL110AA) on a model nicked substrate. Substrate and product are indicated on the left with radiolabelled strands indicated in red and label position by a red asterisk. Substrate was incubated with 0, 1.37, 2.75, 5.5, 11 pmol Lig1 proteins and reaction products were separated by denaturing PAGE.



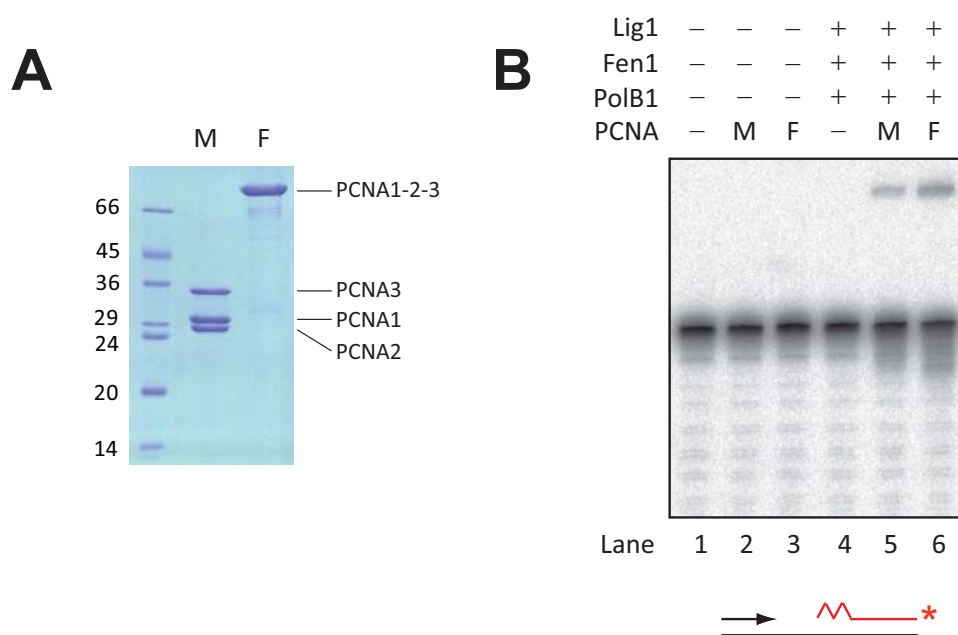

**Figure S4. Both non-fused and fused heterotrimeric PCNA support Okazaki fragment maturation *in vitro***

(A) Comparison of purified recombinant PCNA by SDS-PAGE, visualised by Coomassie staining. Molecular weight markers are on the left, sizes are in kDa. M denotes an equimolar mix of PCNA1, PCNA2 and PCNA3, prepared as described in Supplementary Materials and Methods. F denotes a covalent fusion of PCNA1, PCNA2 and PCNA3. Migration of individual subunits is indicated on the right. (B) Comparison of non-fused and fused heterotrimeric PCNA in stimulating Okazaki fragment maturation *in vitro*. Reactions contained 0.1pmol PolB1, 0.1pmol Fen1, 1pmol Lig1 and 20pmol PCNA (total heterotrimer). Reaction products were separated by denaturing PAGE. Substrate is indicated below gel with radiolabelled strand indicated in red and label position with a red asterisk. The jagged region of the substrate denotes a 13 ribonucleotide primer.

## Supplementary Materials and Methods

### GST pull-down assays

GST-tagged PCNA1 or PCNA3 were prepared as previously (Dionne et al, 2003). Approximately 10 $\mu$ g of GST-fusion protein was incubated with 10 $\mu$ g interaction partner in 100 $\mu$ l TBSTM (10mM Tris pH 8, 150mM NaCl, 5mM MgCl<sub>2</sub>, 0.1% Tween20) for 30 minutes at room temperature with agitation. Beads were recovered by centrifugation and washed three times with 500 $\mu$ l TBSTM. Beads were resuspended in 1X SDS loading dye and proteins were resolved on a 10 or 12% polyacrylamide gel and visualised with Coomassie staining (Fen1) or western blotting with Lig1 antisera (Lig1) (Dionne et al, 2003).

### Idling assays

Assays were adapted from those developed previously (Garg et al, 2004). Substrates were generated by annealing Upstream\_Idling to two-fold excess Template\_Idling and four-fold excess Downstream\_Idling (when present). Reaction mixtures (20 $\mu$ l) contained 50mM Tris pH 7.5, 100mM KCl, 10mM MgCl<sub>2</sub>, 4mM MnCl<sub>2</sub>, 1mM ATP, 100 $\mu$ g/ml BSA, 10mM DTT, 0.1pmol substrate, 100 $\mu$ M dATP, dCTP, dTTP, 10 $\mu$ M dGTP, and 50nM [ $\alpha$ -<sup>32</sup>P]dGTP. 0.1pmol PolB1, 50fmol Dpo4, 0.1pmol Fen1, and 20pmol PCNA were added as indicated, and reactions were incubated at 50°C for 60 minutes before quenching by the addition of 10 $\mu$ l 25mM EDTA, 1% SDS, 5mM dGTP and 5mM dGMP. Reaction products were resolved by thin layer chromatography on PEI/cellulose in 0.5M LiCl, 0.5M formic acid and visualised by autoradiography.

### Supplementary References

Dionne I, Nookala RK, Jackson SP, Doherty AJ, Bell SD (2003) A heterotrimeric PCNA in the hyperthermophilic archaeon *Sulfolobus solfataricus*. *Mol Cell* **11**: 275-282

Garg P, Stith CM, Sabouri N, Johansson E, Burgers PM (2004) Idling by DNA polymerase delta maintains a ligatable nick during lagging-strand DNA replication. *Genes Dev* **18**: 2764-2773
